# Supplementary material for: Monodisperse and size-tunable PbS colloidal quantum dots via heterogeneous precursors
Source: Royal Society of Chemistry journal article supplement (doi:10.1039/c6tc05329g), 2017-01-01
Supplement: c6tc05329g1.pdf [file c6tc05329g1.pdf]

## Electronic Supplementary Information (ESI)

# Monodisperse and Size-Tunable PbS Colloidal Quantum Dots *via* Heterogeneous Precursors

*Samuel Chan,<sup>a</sup> Maning Liu,<sup>a</sup> Kay Latham,<sup>b</sup> Mitsutaka Haruta,<sup>c</sup> Hiroki Kurata,<sup>c</sup> Toshiharu Teranishi<sup>c</sup> and Yasuhiro Tachibana\*<sup>ade</sup>*

<sup>a</sup>School of Engineering, RMIT University, Bundoora, VIC 3083, Australia; <sup>b</sup>School of Science, RMIT University, Melbourne, VIC 3001, Australia; <sup>c</sup>Institute for Chemical Research, Kyoto University, Gokasho, Uji, Kyoto 611-0011, Japan; <sup>d</sup>Office for University-Industry Collaboration, Osaka University, 2-1 Yamada-oka, Suita, Osaka 565-0871, Japan; <sup>e</sup>Japan Science and Technology Agency (JST), PRESTO, 4-1-8 Honcho Kawaguchi, Saitama 332-0012, Japan

## 1. TEM characterization

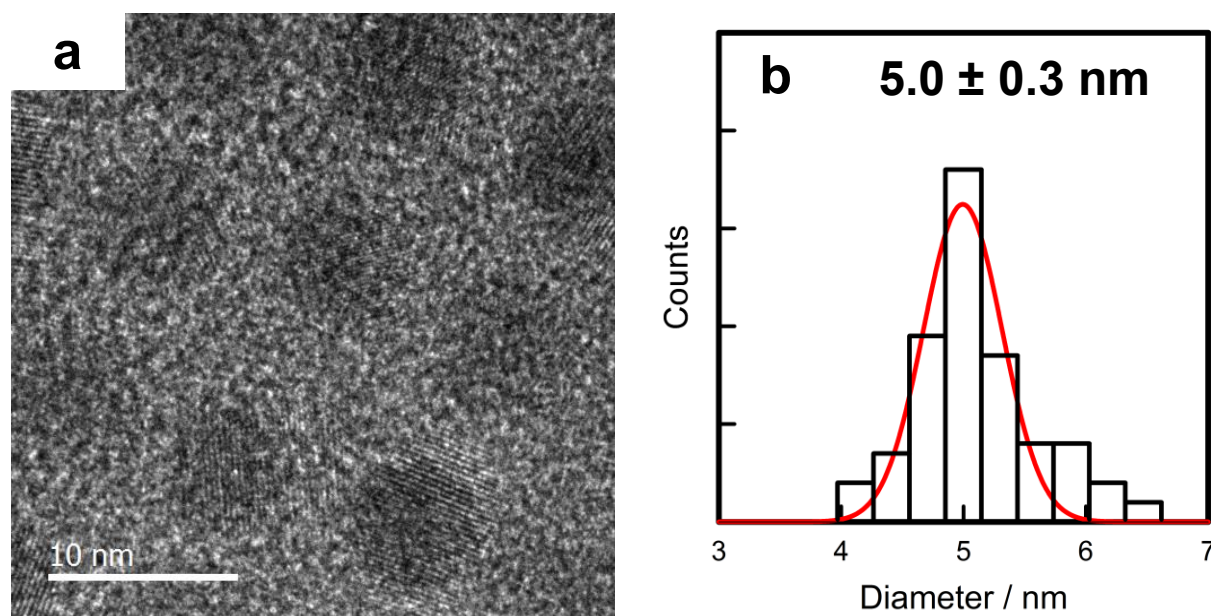

**Fig. S1.** (a) TEM image of PbS QDs obtained after a 1 h reaction time at elevated temperatures of 120 °C (after the size focusing process) with an exciton peak wavelength of 1,520 nm. (b) The corresponding size histogram.

## 2. Reaction conditions and characterization results of PbS QDs shown in Fig. 3

**Table S1.** Absorption peak wavelength and HWHM for PbS QD aliquots withdrawn at various reaction temperatures. All syntheses followed the conditions described in the main text, pertaining to a 4:1 Pb:S precursor ratio.

| Aliquot time (s) | 50°C           |            | 80°C           |            | 100°C          |            | 120°C          |            |
|------------------|----------------|------------|----------------|------------|----------------|------------|----------------|------------|
|                  | Abs. peak (nm) | HWHM (meV) |
| 20               | 886            | 95.0       | 939            | 86.5       | 969            | 69.0       | 1097           | 71.5       |
| 100              | 886            | 109        | 968            | 85         | 1016           | 70.5       | 1320           | 41.9       |
| 600              | 886            | 103        | 1025           | 63         | 1088           | 58.0       | 1376           | 42.0       |
| 1500             | 954            | 71.5       | 1060           | 62.5       | 1138           | 61.0       | 1404           | 49.2       |
| 3600             | 969            | 71.5       | 1098           | 64.3       | 1203           | 76.0       | 1433           | 72.5       |

### 3. Air stability

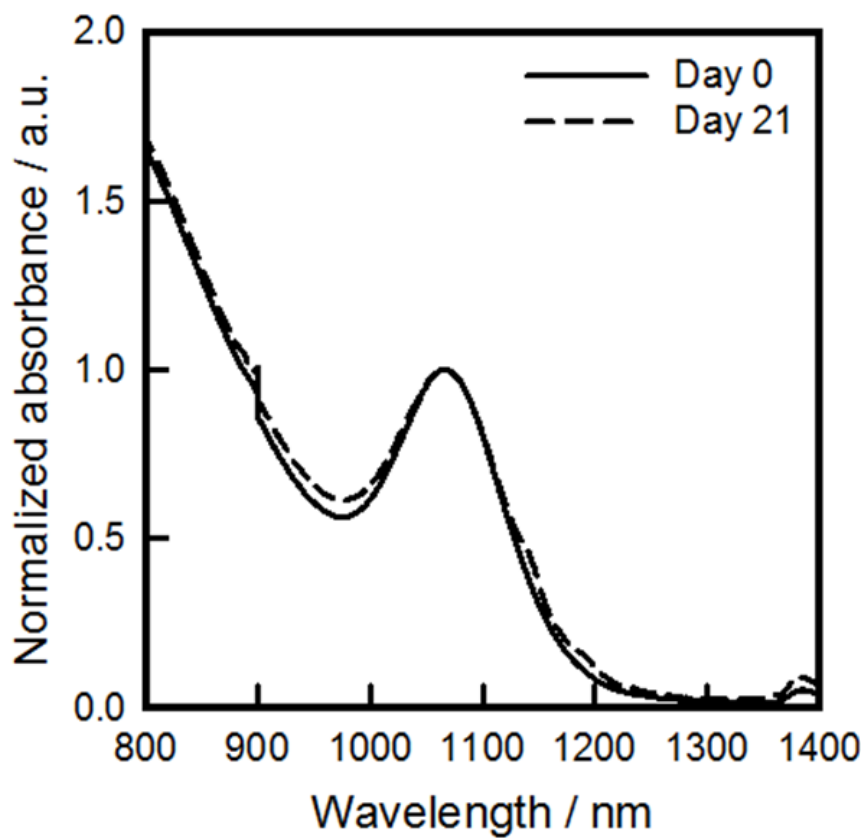

**Fig. S2.** Absorption spectra of 3.6 nm PbS QDs in toluene. The initially synthesized QD indicates an absorption peak at 1,070 nm (Day 0, solid line). The solution was kept in air and stored for three weeks, revealing that the peak position was maintained with minimal changes to the absorption spectrum (dashed line). The spectra were normalized at the exciton peak.
